# Supplementary material for: Nucleic Acid-Sensing Toll-Like Receptors Play a Dominant Role in Innate Immune Recognition of Pneumococci
Source: PubMed Central journal article supplement (PMC7157524; doi:10.1128/mbio.00415-20), 2020-03-24

Suppl. Fig. S4

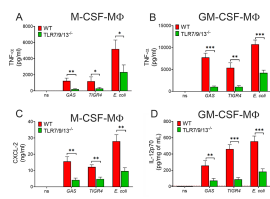

Supplement: mBio.00415-20-sf004.pdf [file mBio.00415-20-sf004.pdf]
